# Supplementary material for: Environmental determinants of malaria transmission in African villages
Source: Springer Nature journal article supplement (doi:10.1186/s12936-016-1633-7), 2016-12-01
Supplement: MOESM3 [file 11105962]

Additional file 3. Figure S3.

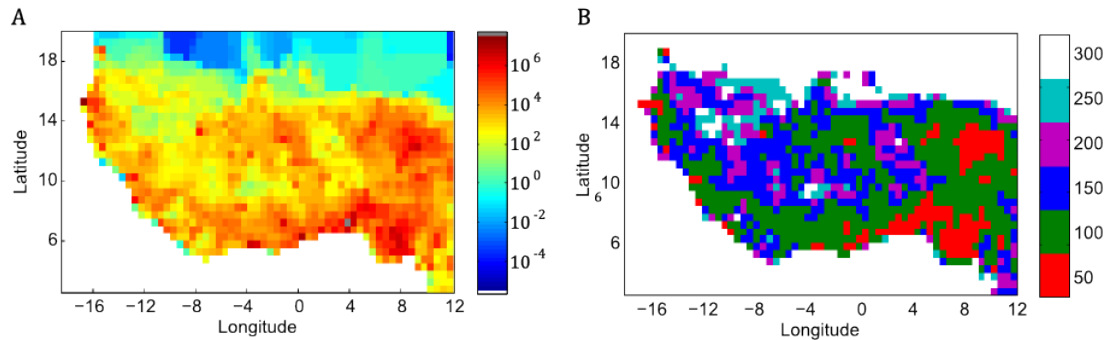

**Fig. S3: Population density and inferred  $X_{dist}$  in West Africa. (A) Population density in West Africa.** Population density [*per km<sup>2</sup>*] is plotted in logarithmic scale. The data were obtained from Gridded Population of the World, Version 3 (GPWv3) for the year 2000 [1]. **(B)  $X_{dist}$  inferred from population density.**

[1] Columbia University. Gridded Population of the World Version 3 (GPWv3), 2005.
