# Supplementary material for: Environmental determinants of malaria transmission in African villages
Source: Springer Nature journal article supplement (doi:10.1186/s12936-016-1633-7), 2016-12-01
Supplement: MOESM4 [file 11105962]

Additional file 4. Figure S4.

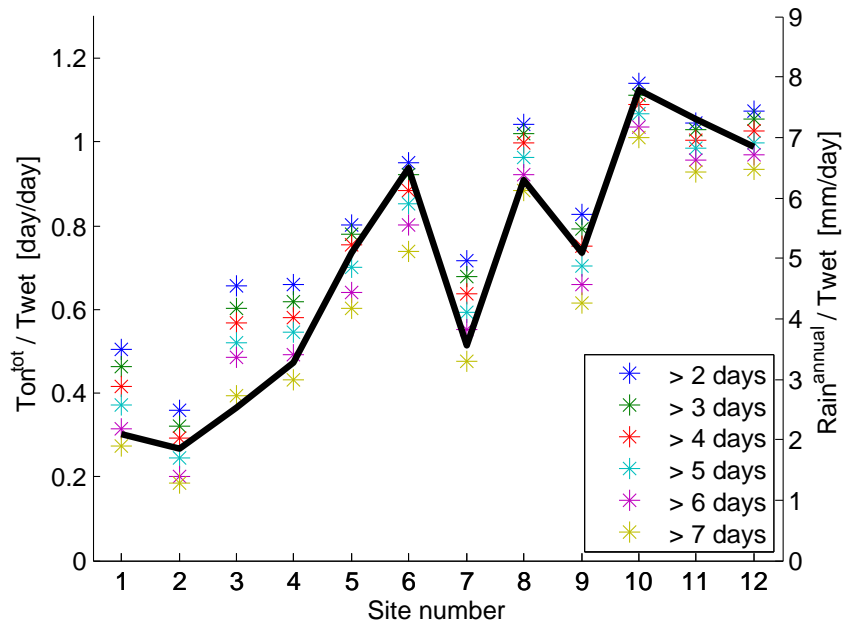

**Fig. S4: Comparison between  $T_{on}^{tot}/T_{wet}$  and  $annual-rainfall/T_{wet}$ .**  $T_{on}^{tot}$  was obtained from HYDREMATS simulation results by Yamana [1], by aggregating the time that the major pool in the simulation domain existed. A value was included in  $T_{on}^{tot}$  only if the pool persisted for more than a certain number of days because the most short-lived temporary pools do not contribute to mosquito population dynamics.  $T_{on}^{tot}$  calculation hence depends on the imposed requirement for the pool persistence. The minimum persistence of pools was set at 2 to 7 days, as indicated in the legend. The value of  $T_{on}^{tot}/T_{wet}$  was calculated for each minimum persistence (stars), and it is shown on the left y-axis.  $Annual-rainfall/T_{wet}$  is shown in black line on the right y-axis. All of  $T_{on}^{tot}$ ,  $T_{wet}$ , annual-rainfall, and  $T_{wet}$  shown here are the fifteen-year average from 1998 to 2012. A significant correlation between  $T_{on}^{tot}/T_{wet}$  and  $annual-rainfall/T_{wet}$  was found.

[1] Yamana TK. Mechanistic modelling of the links between environment, mosquitoes and malaria transmission in the current and future climates of West Africa. PhD thesis, Massachusetts Institute of Technology, February 2015.
