# Supplementary material for: Environmental determinants of malaria transmission in African villages
Source: Springer Nature journal article supplement (doi:10.1186/s12936-016-1633-7), 2016-12-01
Supplement: MOESM6 [file 11105962]

Additional file 6.  $\hat{R}_o = 1$  conditions for different  $Y_{dist}$  and  $T_{int}$ . Figure S6.

### $\hat{R}_o = 1$ conditions for different $Y_{dist}$ and $T_{int}$

In this section, the sensitivity of  $\hat{R}_o$ , especially the  $\hat{R}_o = 1$  contour lines, to  $Y_{dist}$  and  $T_{int}$  is presented. The longitudinal household distance,  $Y_{dist}$ , was varied from 70m, 50m, 30m, to 10m. Sensitivity to the storm inter-arrival time,  $T_{int}$ , was tested for  $T_{int} = 28, 21, \text{ and } 14$  days. The results of the sensitivity tests were reported only at temperature of 27 °C; those at other temperatures revealed a similar trend.

#### *Sensitivity to $Y_{dist}$*

A smaller  $Y_{dist}$  means a denser household network, where mosquitoes would find humans for bloodmeals more easily. The results of  $\hat{R}_o = 1$  contour lines for different  $Y_{dist}$  are shown in Fig. S6. Fig. S6Aa presents the results in the  $T_{wet} - T_{on}$  space:  $Y_{dist} = 70\text{m}$  (dashed line), 50m (solid line), 30m (dotted line), and 10m (dash-dot line). The results with each  $X_{dist}$  value were differentiated by the color:  $X_{dist} = 50\text{m}$  (red), 100m (green), 150m (blue), and 200m (purple). As expected, smaller  $Y_{dist}$  values required smaller  $T_{on}$  and  $T_{int}$  to have the condition for malaria endemics,  $\hat{R}_o = 1$ . Yet the sensitivity to  $Y_{dist}$  varied among different  $X_{dist}$  values. Smaller  $X_{dist}$  of 50m and 100m resulted in a lower sensitivity to  $Y_{dist}$ , whereas larger  $X_{dist}$  of 150m and 200m resulted in a higher sensitivity.

When plotted in the  $D_1 - D_2$  space, a universality of the conditions for  $\hat{R}_o = 1$  was found (Fig. S6Ab).  $Y_{dist}$  values affect  $D_1$  through  $T_o$ , as well as  $\hat{R}_o$ , but not  $D_2$ . Fig. S6Ab shows the conditions that generated  $\hat{R}_o = 1$ , differentiating  $Y_{dist}$  by markers (upward-pointing triangle for  $Y_{dist} = 70\text{m}$ , filled circle for  $Y_{dist} = 50\text{m}$ , square for  $Y_{dist} = 30\text{m}$ , and downward-pointing triangle for  $Y_{dist} = 10\text{m}$ ), as well as  $X_{dist}$  by colors (red for  $X_{dist} = 50\text{m}$ , green for  $X_{dist} = 100\text{m}$ , blue for  $X_{dist} = 150\text{m}$ , and purple for  $X_{dist} = 200\text{m}$ ). Although a certain universality in the conditions for  $\hat{R}_o = 1$  can be found, stratification by  $X_{dist}$  is present. Larger  $X_{dist}$  required slightly higher values of  $D_1$  and/or  $D_2$  for malaria to be endemic, shifting the conditions for  $\hat{R}_o = 1$  upward in the figure. Sensitivity to  $Y_{dist}$ , on the other hand, seems to be negligible when compared at the same  $X_{dist}$ . Because smaller  $X_{dist}$  and  $Y_{dist}$  lead larger malaria transmission potential, the condition for  $\hat{R}_o = 1$  requires shorter  $T_{wet}$  for a given set of  $T_{on}$  and  $T_{int}$ , or  $D_1$ . However, with smaller  $X_{dist}$  and  $Y_{dist}$ , the corresponding  $T_o$  also becomes smaller, which works to counteract the requirement of shorter  $T_{wet}$  and maintains  $T_{wet}/T_o$  or  $D_1$ . The relationship between  $D_1$  and  $D_2$  is thus hold.

#### *Sensitivity to $T_{int}$*

One of the bold assumptions in this study concerns  $T_{int}$ . Fig. S6Ba demonstrates how the  $\hat{R}_o = 1$  contour lines respond to different  $T_{int}$  in the  $T_{wet} - T_{on}$  space:  $T_{int} =$

28 days in solid lines,  $T_{int} = 21$  days in dash lines, and  $T_{int} = 14$  days in dotted lines. The results with each  $X_{dist}$  value were differentiated by the color:  $X_{dist} = 50\text{m}$  (red),  $100\text{m}$  (green),  $150\text{m}$  (blue), and  $200\text{m}$  (purple). At our simulation setting,  $T_{int} = T_{on} + T_{off}$ ; consequently, a smaller  $T_{int}$  for a given  $T_{on}$  means a shorter  $T_{off}$ , making malaria transmission more likely. As a result, smaller  $T_{int}$  resulted in  $\hat{R}_o = 1$  contour lines that require smaller values of  $T_{on}$  and  $T_{wet}$  in general. Note that  $T_{on} \leq T_{int}$ , and so  $T_{on}$  could increase only up to  $T_{int}$ . In the  $T_{wet} - T_{on}$  space, sensitivity to  $T_{int}$  was found significant.

Sensitivity to  $T_{int}$  was then investigated in the dimension-less space of  $D_1$  and  $D_2$  (Fig. S6Bb).  $T_{int}$  affects  $D_2$  ( $= T_{on}/T_{int}$ ), as well as  $\hat{R}_o$ , but not  $D_1$ . Different markers indicate different conditions of  $T_{int}$ : filled circle for  $T_{int} = 28$  days as in the baseline study, diamond for  $T_{int} = 21$  days, square for  $T_{int} = 14$  days. Different colors indicate different  $X_{dist}$  values. Although  $\hat{R}_o$  is sensitive to  $T_{int}$ , the conditions for  $\hat{R}_o = 1$  on the dimension-less space line up in a good agreement among different  $T_{int}$  values, especially when compared at the same  $X_{dist}$ . A certain magnitude of deviation was found for  $T_{int} = 14$  days; however, most of the conditions for  $\hat{R}_o = 1$  observed fell in the *transient zone*.

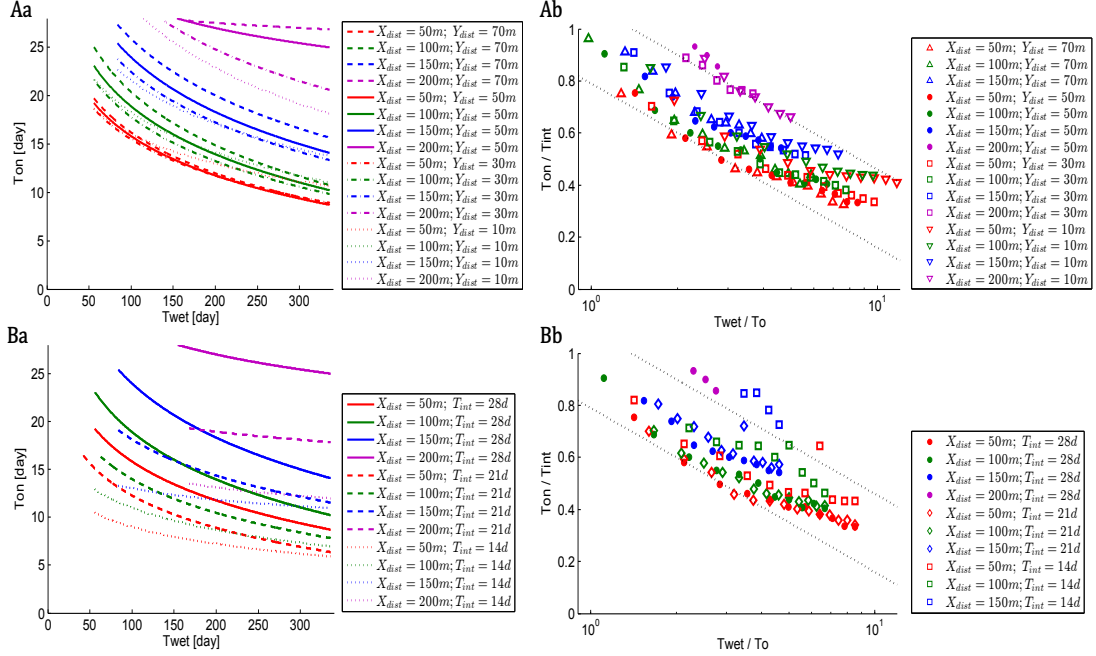

**Fig. S6: Conditions for  $\hat{R}_o = 1$  and the sensitivity to  $X_{dist}$ ,  $Y_{dist}$  and  $T_{int}$ .** (A) Conditions for  $\hat{R}_o = 1$  under different  $Y_{dist}$  at 27 °C. (B) Conditions for  $\hat{R}_o = 1$  under different  $T_{int}$  at 27 °C. Colors indicate different  $X_{dist}$ : red for  $X_{dist} = 50\text{m}$ , green for  $X_{dist} = 100\text{m}$ , blue for  $X_{dist} = 150\text{m}$ , and purple for  $X_{dist} = 200\text{m}$ . (Aa) Sensitivity to  $Y_{dist}$  on the  $T_{wet}-T_{on}$  space: dashed line for  $Y_{dist} = 70\text{m}$ , solid line for  $Y_{dist} = 50\text{m}$  (base value), dash-dot line for  $Y_{dist} = 30\text{m}$ , and dotted line for  $Y_{dist} = 10\text{m}$ . (Ab) Sensitivity to  $Y_{dist}$  on the  $D_1-D_2$  space: upward-pointing triangle for  $Y_{dist} = 70\text{m}$ , filled-in circle for  $Y_{dist} = 50\text{m}$ , square for  $Y_{dist} = 30\text{m}$ , and downward-pointing triangle for  $Y_{dist} = 10\text{m}$ . The area within the dotted lines indicates the *transient zone*. (Ba) Sensitivity to  $T_{int}$  on the  $T_{wet}-T_{on}$  space: solid line for  $T_{int} = 28$  days, dashed line for  $T_{int} = 21$  days, and dotted line for  $T_{int} = 14$  days. (Bb) Sensitivity to  $T_{int}$  on the  $D_1-D_2$  space: filled-in circle for  $T_{int} = 28$  days, diamond for  $T_{int} = 21$  days, and square for  $T_{int} = 14$  days. The area within the dotted lines indicates the *transient zone*.
