# Supplementary material for: Environmental determinants of malaria transmission in African villages
Source: Springer Nature journal article supplement (doi:10.1186/s12936-016-1633-7), 2016-12-01
Supplement: MOESM7 [file 11105962]

Additional file 7.  $\hat{R}_o = 1$  conditions in  $T_{wet} - T_{on}$  space. Figure S7.

### $\hat{R}_o = 1$ conditions in $T_{wet} - T_{on}$ space

Conditions for  $\hat{R}_o = 1$  — the critical value for malaria endemics — at various  $T_{wet}$ ,  $T_{on}$ ,  $X_{dist}$ , and temperature were shown in the dimension-less space of  $D_1$  and  $D_2$  in Fig. 3, revealing a universality. The same conditions for  $\hat{R}_o = 1$  were plotted on the plane of  $T_{wet}$  and  $T_{on}$  as contour lines in Fig. S7. Fig. S7A shows the contour lines of  $\hat{R}_o = 1$  for different  $X_{dist}$  values at a fixed temperature of 27 °C. Fig. S7B shows the contour lines of  $\hat{R}_o = 1$  for different temperatures at  $X_{dist} = 100$  m. The figures illustrate that the conditions for stable malaria transmission depends on  $T_{wet}$ ,  $T_{on}$ ,  $X_{dist}$ , and temperature, and that the interplay of these variables is complex. The large dimension and non-linearity of malaria transmission determinants highlight the utility of the *predictive theory*.

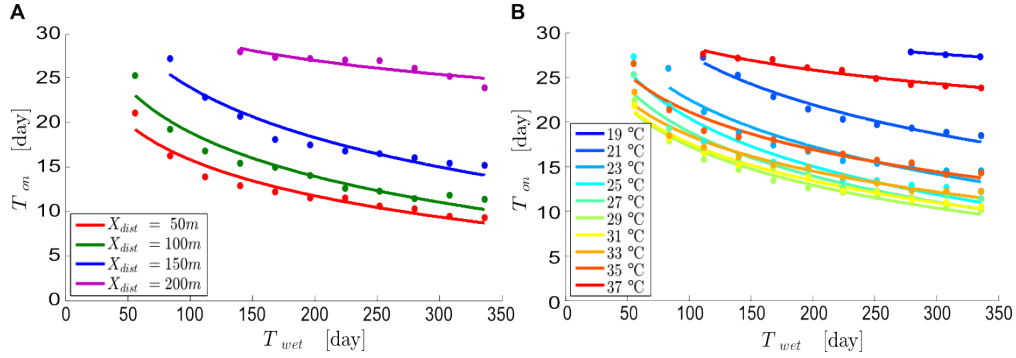

**Fig. S7:**  $\hat{R}_o = 1$  contour lines on the plane of  $T_{on}$  and  $T_{wet}$ . (A)  $\hat{R}_o = 1$  contour lines for different  $X_{dist}$  on the plane of  $T_{on}$  and  $T_{wet}$  at 27 °C. Observed points for  $\hat{R}_o = 1$  (circles) were fitted with natural logarithmic functions (solid lines) on the  $T_{wet}-T_{on}$  space for each  $X_{dist}$ . (B)  $\hat{R}_o = 1$  contour lines for different temperature on the plane of  $T_{on}$  and  $T_{wet}$  at  $X_{dist} = 100$  m. Observed points for  $\hat{R}_o = 1$  (circles) were fitted with natural logarithmic functions (solid lines) on the  $T_{wet}-T_{on}$  space for each temperature.
