# Supplementary material for: Environmental determinants of malaria transmission in African villages
Source: Malar J. 2016 Dec 1;15:578. doi: 10.1186/s12936-016-1633-7 (PMC5131557; doi:10.1186/s12936-016-1633-7)
Supplement: Supplementary file 5 — Additional file 5. Contour lines of To at different Ydist values. [file 12936_2016_1633_MOESM5_ESM.pdf]

Additional file 5. Figure S5.

### $T_o$ for different $Y_{dist}$

The introduced biological timescale,  $T_o$ , is a function of temperature and spatial distribution of pools and houses. Dependence of  $T_o$  on temperature,  $X_{dist}$ , and  $Y_{dist}$  are shown in Fig. S5. Smaller  $X_{dist}$  and  $Y_{dist}$  lead higher malaria transmission potential, shortening  $T_o$ .

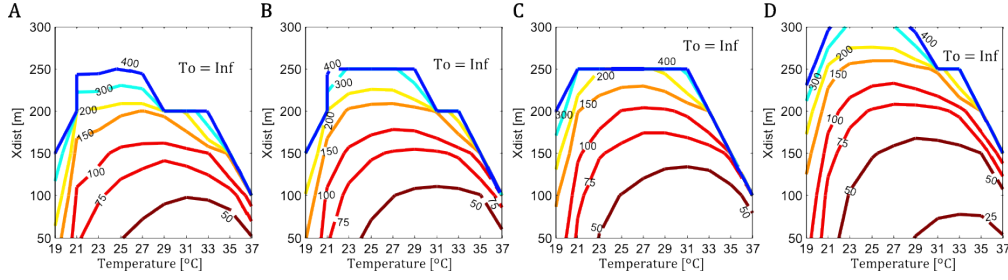

**Fig. S5: Contour lines of  $T_o$  at different  $Y_{dist}$  values.** Contour lines of  $T_o$  at  $Y_{dist} = 70\text{m}$  (A),  $50\text{m}$  (B),  $30\text{m}$  (C), and  $10\text{m}$  (D). The contour lines of  $T_o$  were drawn at intervals of 25 days from  $T_o=50$  to 100, of 50 days from  $T_o=100$  to 200, and of 100 days beyond that. Beyond the blue line,  $T_o$  became infinite, where the system equilibrated at  $\hat{R}_o < 1$ .
